# Supplementary material for: Structuring supplemental materials in support of reproducibility
Source: PubMed Central journal article supplement (PMC5382465; doi:10.1186/s13059-017-1205-3), 2017-04-05
Supplement: 13059_2017_1205_MOESM2_ESM.pdf [file 13059_2017_1205_MOESM2_ESM.pdf]

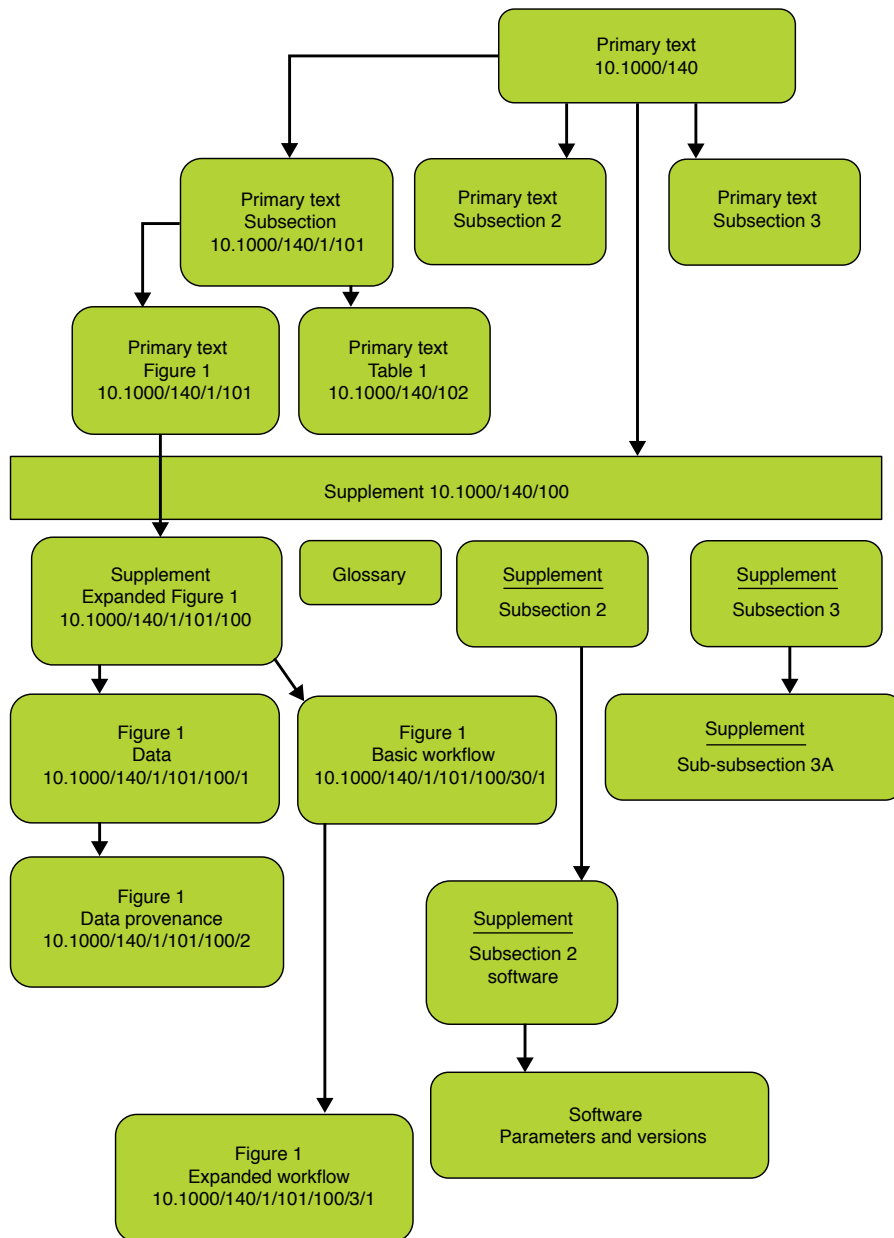

## **Σ. Fig. #1A**

Σ.Fig.1A is a supplement to Fig. 1 in the primary text. Like the supplement itself, Σ.Fig.1 expands on the information provided in Fig.1, in fashion paralleling Fig. 1. For example, for each subsection, the figure shows a digital object identifier (DOI) that identifies each section, and like the primary text itself, is indexed. In addition to the DOI, each section should also provide one or more authors and their contact information. Supplements may also include, in addition to the elements provided in Fig. 1, a glossary, as well as non-parallel sections, as shown in Σ.Fig.1. Further, the supplement figure indicates that supplements will provide additional relevant background information for tables and figures provided in the primary text, including data provenance, software, schematic workflows, and more expanded workflows. Software used in the primary text may be better described in the supplemental text, including descriptions of the parameters employed, and a software version number. The supplement may also contain descriptions of failed research efforts, such that negative results are also provided, not simply the positive results that are often given in the primary text.

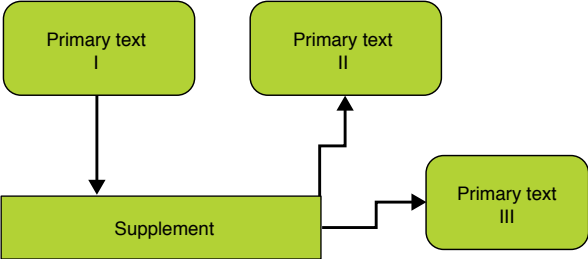

**Σ. Fig. #1B**

Primary Texts I, II and III may be related papers; for example, part of a rollout from a consortium study. Alternatively, Primary Texts I, II and III may be substantially unrelated but have some related components; for example, they may share a data set or workflow. Primary Texts I, II and III may represent successive efforts by the same or different groups in a research endeavor. Primary Texts I, II and III may be otherwise seemingly unrelated. Here, the Supplement can present connections that are obvious or not, parallels and relationships between the papers, thus providing greater context for the audience.
